# Supplementary material
Source: MDPI journal article supplement (https://www.mdpi.com/2297-8739/11/1/27)
Supplement: s1 [file s1]

Archive with 2 entries (2 files):
- Supplementary Material_ Table_Version3.xlsx
- Supplementary Material_Figure_Version2.pdf
