# Supplementary material
Source: MDPI journal article supplement (https://www.mdpi.com/2297-8739/11/1/27)
Supplement: s1 [file s1 › Supplementary Material_ Table_Version3.xlsx]

## Sheet: Table S1
Table S1: Table of the known contaminants removed from the analysis.
tert-Butyldimethylsilanol	Cyclotrisiloxane, hexamethyl-
Sulfur dioxide	Cyclotetrasiloxane, octamethyl-
Silane, tetramethyl-	Carbon dioxide
Silane, difluorodimethyl-	Carbon disulfide
Phthalic acid, di(2-methylbutyl) ester	Arsenous acid, tris(trimethylsilyl) ester
Nitrous oxide	2',6'-Dihydroxyacetophenone, bis(trimethylsilyl) ether
Nickel tetracarbonyl	2,5-Dihydroxyacetophenone, bis(trimethylsilyl) ether
Decamethyltetrasiloxane	1-Pentene, 1,3-diphenyl-1-(trimethylsilyloxy)-

## Sheet: Table S2
Table S2. A list of compounds selected for the optimization of extraction time and temperature, and salt concentration
Num	Peak Name	Class	Kow	RT1 (Second)	RT2 (Second)	RI_cal†	RI_Ref	RI_Dif	Hit Number	Similarity Score	ExtractTime/Temp*	SaltAddition*
1	Hexanal	Aldehyde	1.488	327.5	1.205	803.226	798	5.22581	4	902	No	Yes
2	2,4-Dimethyl-1-heptene	Aliphatic Hydrocarbon	3.802	370	0.81	842.396	850	7.60369	2	872	No	Yes
3	1-Methoxy-2-propyl acetate	Ester	0.292	392.5	1.4	863.134	870	6.86636	2	818	No	Yes
4	Ethylbenzene	Aromatic Compound	2.93	407.5	1.175	876.959	878	1.04147	4	815	Yes	Yes
5	3-Heptanone	Ketone	2.396	417.5	1.16	886.175	887	0.824885	5	854	Yes	Yes
6	3-Heptanol	Alcohol	2.189	432.5	1.48	895	892	3	5	814	Yes	Yes
7	1,3,5,7-Cyclooctatetraene	Aromatic Compound	2.109	435	1.465	902.381	894	8.38095	4	839	Yes	Yes
8	Cyclohexanone	Ketone	1.488	437.5	1.6725	902.381	903	0.619048	5	929	Yes	Yes
9	Heptanal	Aldehyde	2.097	435	1.205	902.381	902	0.380952	5	862	Yes	Yes
10	Ethanol, 2-butoxy-	Alcohol	0.758	442.5	2.06	909.524	907	2.52381	2	846	Yes	Yes
11	Hexanal, 2-ethyl-	Aldehyde	2.64	492.5	1.08	957.143	954	3.14286	4	820	Yes	Yes
12	Camphene	Aliphatic Hydrocarbon	2.86	497.5	0.91	961.905	958	3.90476	4	955	No	Yes
13	Benzaldehyde	Aromatic	1.686	512.5	0.03	976.19	970	6.19048	4	851	Yes	Yes
14	1-Octen-3-one	Ketone	2.897	515	1.28	978.571	979	0.428571	1	872	No	Yes
15	Decane	Aliphatic Hydrocarbon	4.909	537.5	0.795	1000	1000	0	4	868	No	Yes
16	Benzene, tert-butyl-	Aromatic Compound	3.91	537.5	1.1025	1000	990	10	3	841	No	No
17	Benzene, cyclopropyl-	Aromatic Compound	2.755	547.5	1.38	1010	1010	0	1	875	Yes	Yes
18	1-Hexanol, 2-ethyl-	Alcohol	2.504	567.5	1.62	1030	1033	3	4	929	Yes	Yes
19	Cyclohexene, 1-methyl-4-(1-methylethenyl)-, (S)-	Aliphatic Hydrocarbon	3.22	577.5	0.975	1040	1037	3	1	741	Yes	Yes
20	Benzeneacetaldehyde	Aromatic Compound	1.452	595	0.02	1057.5	1049	8.5	4	810	Yes	No
21	Phenol, 3-methyl-	Aromatic Compound	1.94	610	0.49	1072.5	1074	1.5	1	793	No	No
22	Acetophenone	Aromatic Compound	1.531	617.5	2.39	1080	1070	10	6	885	Yes	Yes
23	Benzene, 1,3-bis(1,1-dimethylethyl)-	Aromatic Compound	5.59	780	0.96	1255.56	1249	6.55556	3	932	Yes	Yes
24	Nonanoic acid	Acid	3.145	790	1.9	1266.67	1264	2.66667	6	839	Yes	Yes
25	Propofol	Aromatic Compound	3.79	875	1.96	1368.75	1365	3.75	4	890	Yes	Yes
26	Butylated Hydroxytoluene	Aromatic Compound	5.1	990	1.23	1516.67	1511	5.66667	4	801	Yes	Yes
27	Ethylene oxide	Ether	-0.8	97.5	0.885	-	400	-	3	949	No	No
28	Ethanol	Alcohol	-0.19	102.5	1.43	-	450	-	3	945	Yes	Yes
29	Acetone	Ketone	-0.16	112.5	1	-	-	-	5	971	Yes	Yes
30	2-Propanol, 2-methyl-	Alcohol	0.51	122.5	1.16	-	526	-	4	935	Yes	Yes
31	Propanal, 2-methyl-	Aldehyde	0.72	135	0.945	-	558	-	4	868	Yes	No
32	2-Butanone, 3-methoxy-3-methyl-	Ketone	0.17	140	0.795	-	1434	-	1	848	Yes	Yes
33	2,3-Butanedione	Ketone	-1.33	150	1.385	-	613	-	3	934	Yes	Yes
34	2-Butanone	Ketone	0.37	152.5	1.125	-	605	-	5	941	Yes	Yes
35	2-Butanol	Alcohol	0.69	157.5	1.56	-	576	-	4	943	Yes	Yes
36	Propane, 2-ethoxy-2-methyl-	Ether	1.68	167.5	0.795	-	615	-	2	867	Yes	Yes
37	Cyclopentane, methyl-	Aliphatic Hydrocarbon	3.31	175	0.78	-	629	-	1	889	No	Yes
38	1-Propanol, 2-methyl-	Alcohol	0.69	175	1.88	-	637	-	4	949	Yes	Yes
39	Amylene hydrate	Alcohol	1.04	182.5	1.365	-	-	-	3	918	Yes	Yes
40	Butanal, 3-methyl-	Aliphatic Hydrocarbon	1.25	192.5	1.08	-	650	-	4	907	Yes	Yes
41	Benzene	Aromatic Compound	2.22	200	1.12	-	662	-	4	864	Yes	Yes
42	2-Pentanone	Ketone	0.9	217.5	1.185	-	703	-	3	941	Yes	Yes
43	(R)-(-)-2-Pentanol	Alcohol	1.22	230	1.68	-	-	-	2	920	Yes	Yes
44	3-Buten-1-ol, 3-methyl-	Alcohol	1.11	262.5	0.045	-	730	-	4	889	Yes	Yes
45	1-Butanol, 3-methyl-	Alcohol	1.22	262.5	2.075	-	-	-	4	855	Yes	Yes
46	Methyl Isobutyl Ketone	Ketone	1.25	265	1.14	-	735	-	3	894	Yes	Yes
47	2-Hexanol, (S)-	Alcohol	1.75	285	1.61	-	783	-	1	875	Yes	Yes
48	Furan, tetrahydro-2,2,5,5-tetramethyl-	Ether	2.39	287.5	0.85	-	759	-	2	925	Yes	Yes
49	Heptane, 4-methyl-	Aliphatic Hydrocarbon	4.82	290	0.775	-	764	-	4	904	Yes	Yes
50	Toluene	Aromatic Compound	2.68	297.5	1.165	-	757	-	7	948	Yes	Yes
51	2-Hexanone	Ketone	1.44	312	1.23	-	792	-	3	881	Yes	Yes
*Yes and No in these two columns mean if the compound was used in the data analysis of extraction time/temperature or salt addition effect.
†RI represents retention index. RI_Cal means calculated retention index; RI_Ref means retention index reference; RI_Dif means the difference between the reference and calculated retention index.
In summary, 41 compounds were included for extraction time and temperature data analysis; 46 compounds were included in the salt addition data analysis.

## Sheet: Table S3
Table S3. The central composite design (CCD) Minitab output table
Analysis of Variance (Total Peak Area)
Source	DF	Adj SS	Adj MS	F-Value	P-Value
Model	6	2169.96	361.66	2.4	0.139
Blocks	1	68.64	68.643	0.46	0.521
Linear	2	1444.89	722.445	4.79	0.049
Extraction Time	1	984.35	984.351	6.53	0.038
Extraction Temp	1	460.54	460.538	3.06	0.124
Square	2	566.18	283.089	1.88	0.222
Extraction Time*Extraction Time	1	55.85	55.846	0.37	0.562
Extraction Temp*Extraction Temp	1	533.54	533.538	3.54	0.102
2-Way Interaction	1	90.25	90.25	0.6	0.464
Extraction Time*Extraction Temp	1	90.25	90.25	0.6	0.464
Error	7	1054.97	150.71
Lack-of-Fit	3	1015.63	338.545	34.43	0.003
Pure Error	4	39.33	9.833
Total	13	3224.93
Analysis of Variance (Total Peak Number)
Source	DF	Adj SS	Adj MS	F-Value	P-Value
Model	6	38157900000000	6359650000000	2.88	0.096
Blocks	1	98868690144	98868690144	0.04	0.838
Linear	2	36840400000000	18420200000000	8.35	0.014
Extraction Time	1	36478100000000	36478100000000	16.54	0.005
Extraction Temp	1	362362000000	362362000000	0.16	0.697
Square	2	1202250000000	601125000000	0.27	0.769
Extraction Time*Extraction Time	1	303243000000	303243000000	0.14	0.722
Extraction Temp*Extraction Temp	1	815392000000	815392000000	0.37	0.562
2-Way Interaction	1	16306396112	16306396112	0.01	0.934
Extraction Time*Extraction Temp	1	16306396112	16306396112	0.01	0.934
Error	7	15441500000000	2205930000000
Lack-of-Fit	3	15040200000000	5013420000000	49.98	0.001
Pure Error	4	401249000000	100312000000
Total	13	53599400000000

## Sheet: Table S4
Table S4. Reproducibility of the six samples in the center point
Sample Name	Total Peak Number	Total Peak Area
Block1_43.5c_35min.1	194	16928834
Block1_43.5c_35min.2	209	18170252
Block1_43.5c_35min.3	214	16247883
Block2_43.5c_35min.1	215	17174319
Block1_43.5c_35min.2	216	15683692
Block1_43.5c_35min.3	214	14449169
%RSD	0.04	0.079
RSD - relative standard deviation
