# Supplementary material
Source: MDPI journal article supplement (https://www.mdpi.com/2297-8739/11/1/27)
Supplement: s1 [file s1 › Supplementary Material_Figure_Version2.pdf]

## Supplementary Material

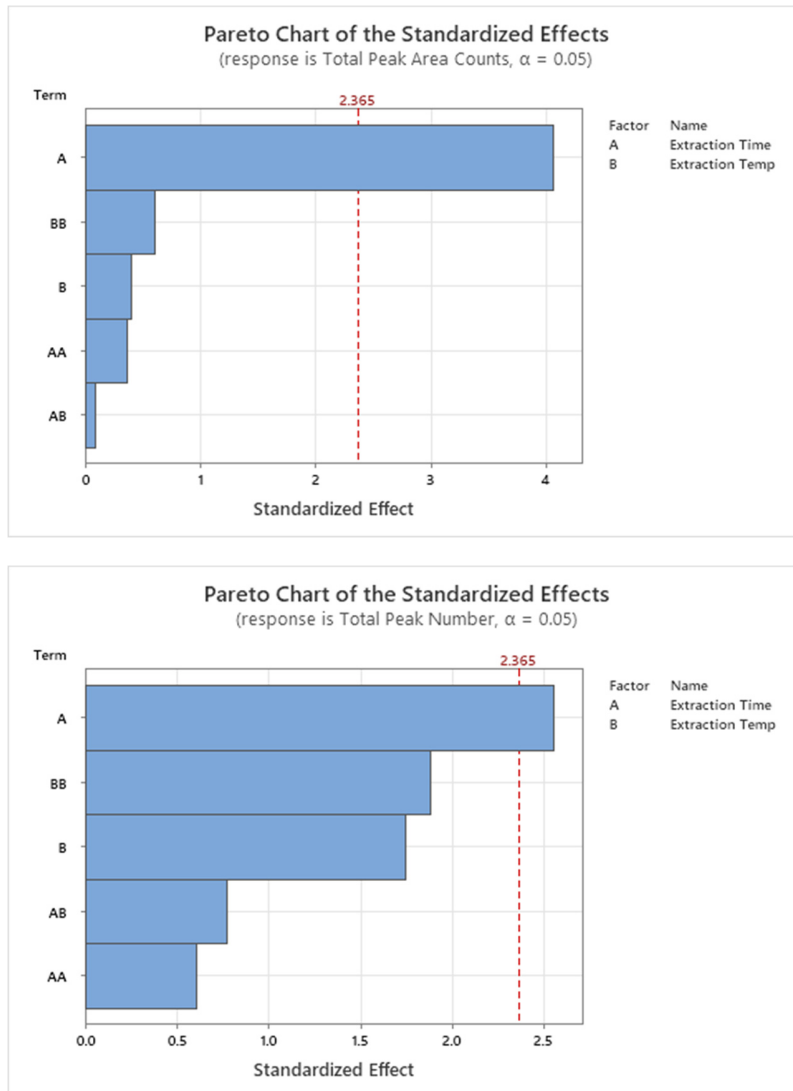

Figure S1. Pareto Chart of the response surface analysis for total peak area and total peak number.

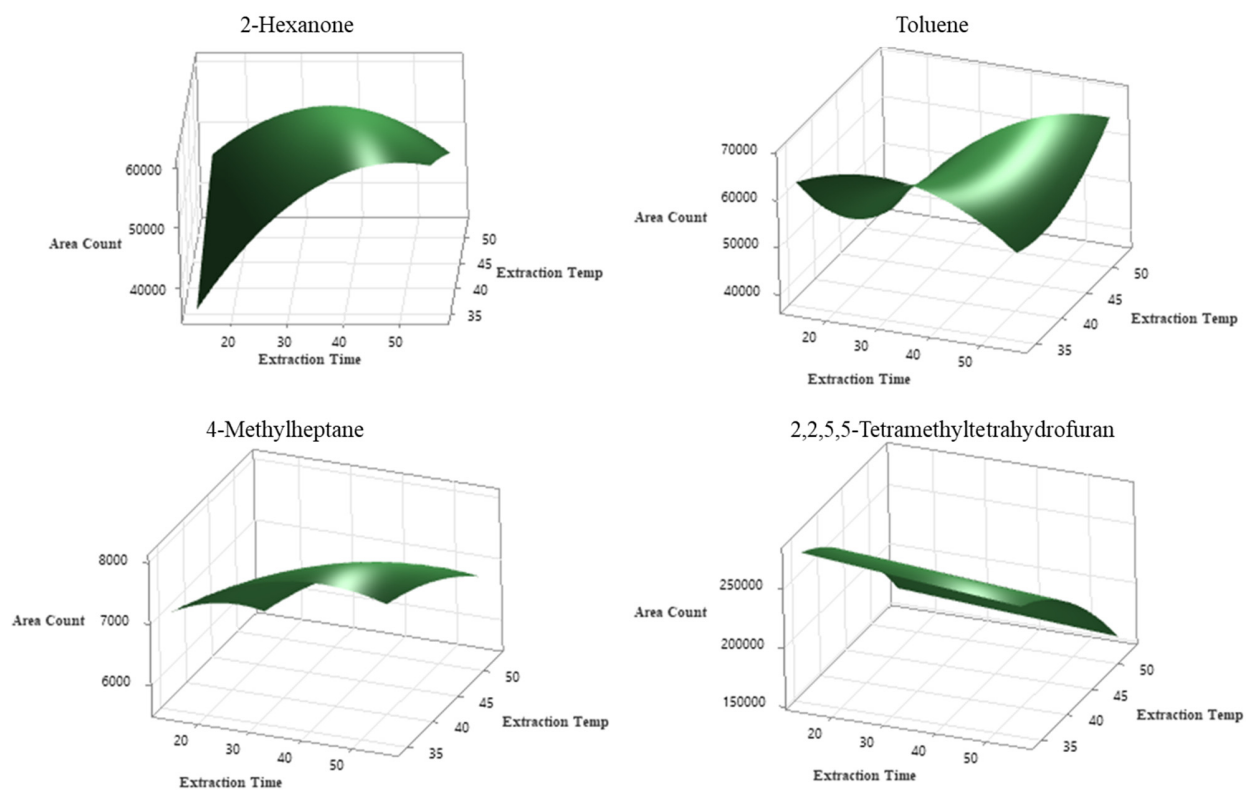

Figure S2. Perspective plots of four out of the 41 selected compounds. The unit of extraction time is minute, the unit of extraction temperature is °C.

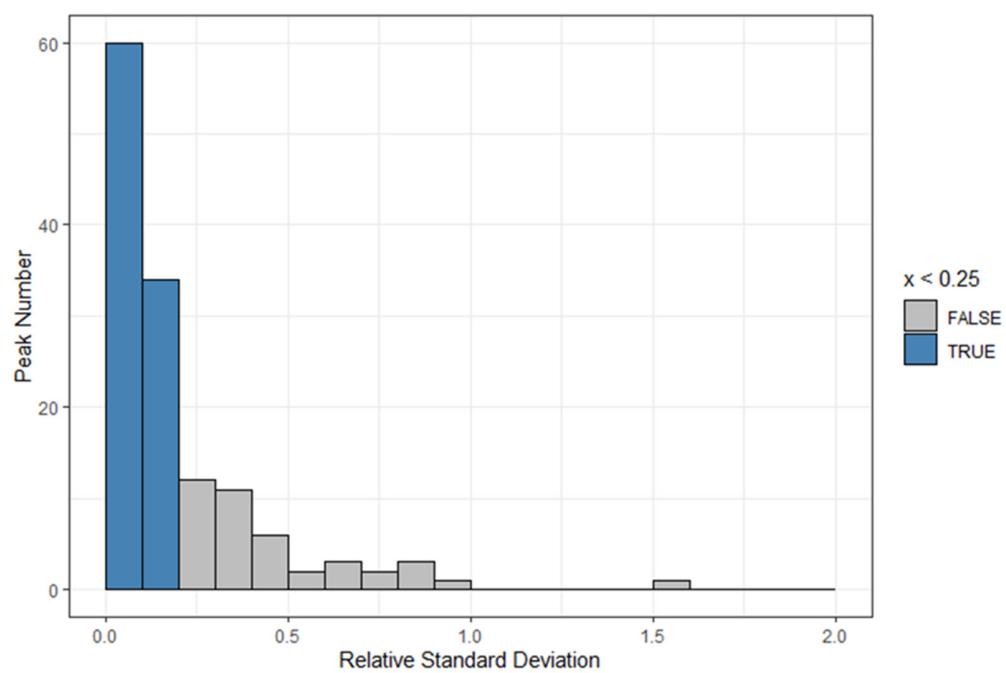

Figure S3. Relative standard deviation (RSD) of individual compound in the six samples of the center point.
